# Supplementary material for: Newly Isolated Virulent Salmophages for Biocontrol of Multidrug-Resistant Salmonella in Ready-to-Eat Plant-Based Food
Source: MDPI journal article supplement (doi:10.3390/ijms241210134), 2023-06-14
Supplement: s1 [file s1]

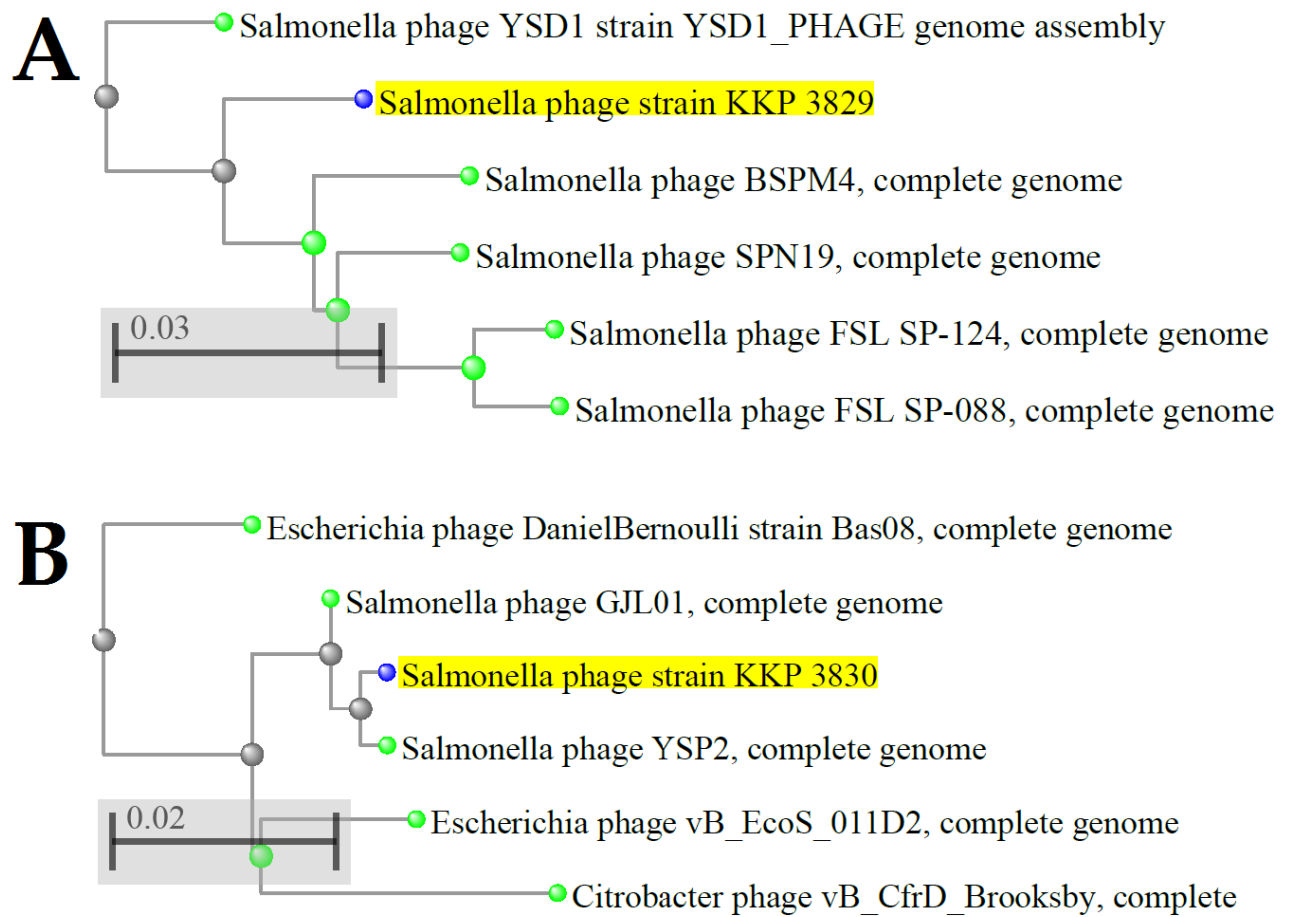

**Figure S1.** Phylogenetic relatedness of: A – *Salmonella* phage strain KKP 3829; B – *Salmonella* phage strain KKP 3830 against most common phage hits ( $n = 5$ ) in the NCBI database [97]. The phylogenetic tree was constructed using neighbour-joining method.
