# Supplementary material for: Newly Isolated Virulent Salmophages for Biocontrol of Multidrug-Resistant Salmonella in Ready-to-Eat Plant-Based Food
Source: MDPI journal article supplement (doi:10.3390/ijms241210134), 2023-06-14
Supplement: s1 [file s1]

**Table S2.** BLASTn alignment of homologs phages sequences (at the GenBank database) with isolated salmophages.

| Phage (complete genome)                               | Genome Length [bp] | G+C Content [%] | No. of Genes / Protein | E-Value | Query Coverage [%] | Percent Identity [%] | Phage Family          | Genome       | Isolated Country | Isolation Source    | Lab Host                     | GenBank Accession No. |
|-------------------------------------------------------|--------------------|-----------------|------------------------|---------|--------------------|----------------------|-----------------------|--------------|------------------|---------------------|------------------------------|-----------------------|
| <b><i>Salmonella</i> phage strain KKP 3829</b>        |                    |                 |                        |         |                    |                      |                       |              |                  |                     |                              |                       |
| <i>Salmonella</i> phage FSL SP-124                    | 59,245             | 56.5            | 71/71                  | 0.0     | 96                 | 96.13                | <i>Casjensviridae</i> | Linear DNA   | USA              | ND                  | <i>Salmonella enterica</i>   | KC139515.1            |
| <i>Salmonella</i> phage FSL SP-088                    | 59,454             | 56.4            | 70/70                  | 0.0     | 96                 | 96.06                | <i>Casjensviridae</i> | Linear DNA   | USA              | ND                  | <i>Salmonella enterica</i>   | NC_021780.1           |
| <i>Salmonella</i> phage SPN19                         | 59,203             | 56.5            | 72/72                  | 0.0     | 95                 | 96.21                | <i>Casjensviridae</i> | Circular DNA | South Korea      | ND                  | <i>Salmonella</i> sp.        | JN871591.1            |
| <i>Salmonella</i> phage YSD1 strain YSD1_PHAGE        | 58,916             | 56.5            | 71/71                  | 0.0     | 87                 | 96.28                | <i>Casjensviridae</i> | Circular DNA | United Kingdom   | ND                  | <i>S. Typhi</i>              | NC_048666.1           |
| <i>Salmonella</i> phage BSPM4                         | 59,097             | 56.5            | 78/78                  | 0.0     | 96                 | 95.69                | <i>Casjensviridae</i> | Linear DNA   | South Korea      | swine intestine     | <i>S. Typhimurium</i>        | NC_048655.1           |
| <b><i>Salmonella</i> phage strain KKP 3830</b>        |                    |                 |                        |         |                    |                      |                       |              |                  |                     |                              |                       |
| <i>Salmonella</i> phage YSP2                          | 50,316             | 42.9            | 87/87                  | 0.0     | 98                 | 99.74                | <i>Drexelviriidae</i> | Linear DNA   | China            | sewage              | <i>S. Pullorum</i>           | NC_047898.1           |
| <i>Salmonella</i> phage GJL01                         | 50,407             | 42.8            | 80/80                  | 0.0     | 97                 | 99.77                | <i>Drexelviriidae</i> | Linear DNA   | China            | sewage              | <i>S. Pullorum</i> SP1       | KY657202.1            |
| <i>Escherichia</i> phage vB_EcoS_011D2                | 50,633             | 42.9            | 89/89                  | 0.0     | 93                 | 97.97                | <i>Drexelviriidae</i> | Linear DNA   | China            | sewage              | <i>Escherichia coli</i>      | MT478992.1            |
| <i>Escherichia</i> phage DanielBernoulli strain Bas08 | 50,731             | 43.2            | 91/91                  | 0.0     | 86                 | 96.86                | <i>Drexelviriidae</i> | Linear DNA   | Switzerland      | sewage plant inflow | <i>Escherichia coli</i> K-12 | MZ501059.1            |
| <i>Citrobacter</i> phage vB_CfrD_Brooksby             | 50,071             | 42.8            | 86/86                  | 0.0     | 89                 | 96.94                | <i>Drexelviriidae</i> | Linear DNA   | USA              | raw sewage          | <i>Citrobacter freundii</i>  | OL539443.1            |

ND – no data
