# Supplementary material for: Newly Isolated Virulent Salmophages for Biocontrol of Multidrug-Resistant Salmonella in Ready-to-Eat Plant-Based Food
Source: MDPI journal article supplement (doi:10.3390/ijms241210134), 2023-06-14
Supplement: s1 [file s1]

**A**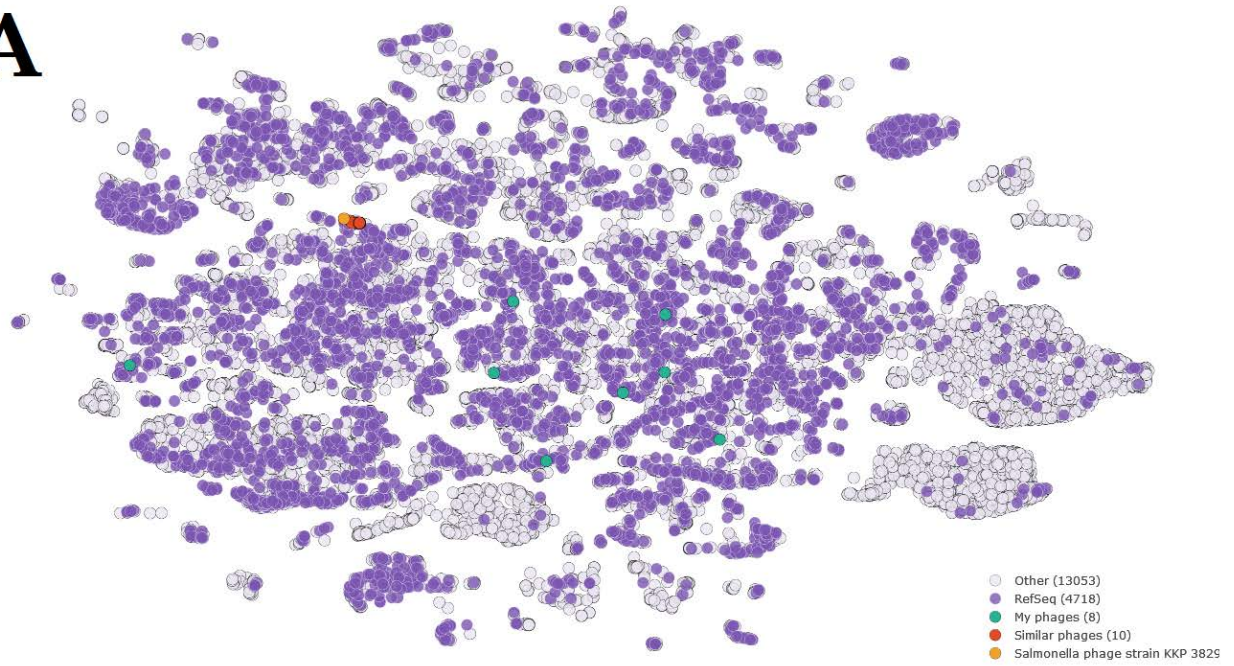**B**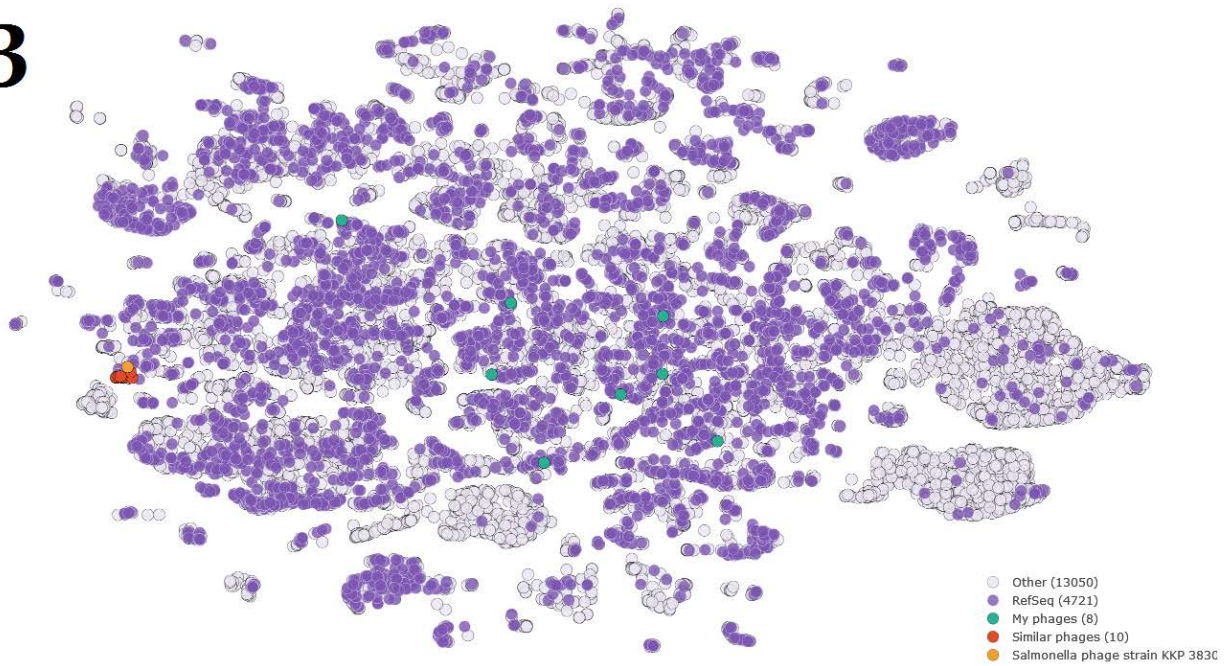

**Figure S2.** Phage similarity on 2D scatter plot computationally predicted and rendered through PhageAI software [98]: A – *Salmonella* phage strain KKP 3829; B – *Salmonella* phage strain KKP 3830.
