# Supplementary material for: Newly Isolated Virulent Salmophages for Biocontrol of Multidrug-Resistant Salmonella in Ready-to-Eat Plant-Based Food
Source: Int J Mol Sci. 2023 Jun 14;24(12):10134. doi: 10.3390/ijms241210134 (PMC10299301; doi:10.3390/ijms241210134)
Supplement: Supplementary file 1 [file ijms-24-10134-s001.zip]

Archive with 4 entries (4 files):
- ijms-2371682-Figure S1.pdf
- ijms-2371682-Figure S2.pdf
- ijms-2371682-Table S1.xlsx
- ijms-2371682-Table S2.pdf
