# Supplementary material for: Newly Isolated Virulent Salmophages for Biocontrol of Multidrug-Resistant Salmonella in Ready-to-Eat Plant-Based Food
Source: Int J Mol Sci. 2023 Jun 14;24(12):10134. doi: 10.3390/ijms241210134 (PMC10299301; doi:10.3390/ijms241210134)
Supplement: Supplementary file 1 [file ijms-24-10134-s001.zip › ijms-2371682-Table S1.xlsx]

## Sheet: Salmonella phage KKP 3829
Table S1 (A). Genome annotation of functional ORFs of thef Salmonella phage strain KKP 3829.
Protein ID	Features type	Length [amino acids]	CDS location in phage genome	Classification of structural protein	Phrog ID	Phrog protein	Domain	Classify functional protein
contig_3.1	CDS	30	90 - 1	Other(9.57)	28351	KT070866_p81	ND	unknown function
contig_3.136	CDS	51	291 - 136	HTJ(4.61)	8116	NC_031930_p71	ND	unknown function
contig_3.288	CDS	37	401 - 288	Other(7.77)	8116	NC_031930_p71	ND	unknown function
contig_3.394	CDS	84	648 - 394	Other(9.98)	7646	NC_031930_p70	ND	unknown function
contig_3.641	CDS	68	847 - 641	Other(9.99)	8059	NC_019417_p3	ND	unknown function
contig_3.850	CDS	90	1122 - 850	Other(10.0)	3786	KR296689_p88	ND	unknown function
contig_3.1137	CDS	388	2303 - 1137	Other(4.43)	10087	NC_025442_p71	ND	unknown function
contig_3.2429	CDS	73	2650 - 2429	Other(8.22)	8635	NC_025442_p70	ND	unknown function
contig_3.2647	CDS	182	3195 - 2647	Other(4.51)	9514	NC_025442_p69	ND	unknown function
contig_3.3206	CDS	67	3409 - 3206	Other(9.99)	7744	NC_025442_p68	ND	unknown function
contig_3.3421	CDS	160	3903 - 3421	Other(9.02)	10759	NC_025442_p67	ND	unknown function
contig_3.3906	CDS	66	4106 - 3906	Other(9.93)	2385	NC_011042_p4	ND	unknown function
contig_3.4216	CDS	146	4656 - 4216	Other(9.97)	67	KJ019063_p46	ND	DNA methyltransferase
contig_3.4716	CDS	32	4814 - 4716	Other(9.95)	8888	KY514263_p49	ND	DNA polymerase
contig_3.4757	CDS	61	4942 - 4757	Other(7.93)	481	NC_031906_p211	ND	unknown function
contig_3.5185	CDS	32	5087 - 5185	Other(9.98)	28010	NC_031052_p51	ND	unknown function
contig_3.5774	CDS	164	5280 - 5774	Other(10.0)	3377	NC_027355_p168	ND	HNH endonuclease
contig_3.5935	CDS	35	5828 - 5935	Other(10.0)	1531	MH001449_p8	ND	head closure
contig_3.6336	CDS	123	5965 - 6336	Other(4.33)	6647	KY014601_p61	ND	unknown function
contig_3.6848	CDS	146	6408 - 6848	Baseplate(2.21)	7942	NC_021779_p61	ND	unknown function
contig_3.7170	CDS	111	6835 - 7170	Other(9.59)	7734	NC_021779_p60	ND	unknown function
contig_3.7498	CDS	120	7136 - 7498	Other(6.54)	7965	NC_021779_p59	ND	unknown function
contig_3.8552	CDS	357	7479 - 8552	Other(2.3)	724	p80012	['Putative exonuclease, RdgC']	exonuclease recombination-associated
contig_3.8788	CDS	77	8555 - 8788	Other(4.21)	7200	KY620117_p59	ND	unknown function
contig_3.9068	CDS	91	8793 - 9068	Other(9.93)	7587	KY620117_p58	ND	unknown function
contig_3.9247	CDS	34	9143 - 9247	Other(9.6)	16542	NC_021866_p6	ND	unknown function
contig_3.10004	CDS	246	9264 - 10004	Other(7.3)	6886	KY620117_p57	ND	unknown function
contig_3.10675	CDS	224	10001 - 10675	Other(9.39)	8641	KY620117_p56	ND	unknown function
contig_3.11772	CDS	366	10672 - 11772	Baseplate(3.69)	8386	NC_021780_p20	ND	unknown function
contig_3.12458	CDS	228	11772 - 12458	Other(8.2)	111	p64666	['DNA N-6-adenine-methyltransferase (Dam)']	DNA methyltransferase
contig_3.13354	CDS	272	12536 - 13354	Other(7.57)	8209	NC_021779_p51	ND	unknown function
contig_3.13559	CDS	64	13365 - 13559	Other(9.94)	9067	NC_019524_p50	ND	unknown function
contig_3.13777	CDS	71	13562 - 13777	Other(5.01)	8705	KY014601_p48	ND	unknown function
contig_3.14021	CDS	84	13767 - 14021	Other(9.52)	9722	NC_009015_p20	ND	unknown function
contig_3.14515	CDS	170	14003 - 14515	Other(8.37)	9072	KR296689_p63	ND	thymidylate synthase complementing protein
contig_3.14877	CDS	93	14596 - 14877	Other(9.71)	3012	p314959	ND	unknown function
contig_3.15185	CDS	103	14874 - 15185	Other(9.72)	9301	KR296689_p61	ND	unknown function
contig_3.15625	CDS	147	15182 - 15625	Other(9.72)	8264	NC_021783_p30	ND	unknown function
contig_3.15881	CDS	84	15627 - 15881	Other(9.99)	8098	NC_021779_p42	ND	unknown function
contig_3.16340	CDS	142	15912 - 16340	HTJ(4.83)	8098	NC_021779_p42	ND	unknown function
contig_3.16419	CDS	29	16330 - 16419	Other(6.31)	34199	p173054	ND	unknown function
contig_3.16700	CDS	94	16416 - 16700	Other(9.34)	18367	NC_021783_p32	ND	unknown function
contig_3.17158	CDS	153	16697 - 17158	Other(9.84)	355	KY250482_p69	ND	nucleoside 2-deoxyribosyltransferase
contig_3.17159	CDS	60	17341 - 17159	Other(9.79)	1275	NC_021783_p34	ND	Rz-like spanin
contig_3.17289	CDS	84	17543 - 17289	Other(5.57)	1026	MG897800_p45	ND	Rz-like spanin
contig_3.17540	CDS	237	18253 - 17540	Other(6.49)	873	p239814	ND	endolysin
contig_3.18257	CDS	112	18595 - 18257	Minor capsid(2.9)	7686	NC_021780_p35	ND	Rz-like spanin
contig_3.18660	CDS	746	20900 - 18660	Other(1.77)	7226	NC_021780_p36	ND	unknown function
contig_3.20910	CDS	409	22139 - 20910	Tail fiber(2.66)	10924	NC_021783_p39	ND	unknown function
contig_3.22154	CDS	339	23173 - 22154	Tail fiber(2.65)	2448	KY555143_p100	ND	unknown function
contig_3.23187	CDS	320	24149 - 23187	Minor tail(1.61)	2448	KY555143_p100	ND	unknown function
contig_3.24160	CDS	335	25167 - 24160	Other(2.09)	2448	KY555143_p100	ND	unknown function
contig_3.25177	CDS	246	25917 - 25177	Tail fiber(8.72)	7049	KC139515_p41	['Protein of unknown function (DUF2793)']	tail fiber protein
contig_3.25917	CDS	1296	29807 - 25917	Minor tail(6.89)	6284	KC139515_p42	['Putative phage tail protein']	tail protein
contig_3.29797	CDS	79	30036 - 29797	Other(9.47)	1196	KC139515_p43	ND	tail assembly chaperone
contig_3.30036	CDS	76	30266 - 30036	Other(8.38)	1180	p171114	ND	tail assembly chaperone
contig_3.30278	CDS	272	31096 - 30278	Minor tail(2.83)	778	p171113	['Phage conserved hypothetical protein BR0599', 'Uncharacterized conserved protein (DUF2163)']	tail assembly protein
contig_3.31106	CDS	562	32794 - 31106	Baseplate(1.8)	1082	NC_028812_p46	ND	tail assembly protein
contig_3.32800	CDS	1431	37095 - 32800	Minor capsid(4.54)	2335	p247749	['Tape measure protein']	tail length tape measure protein
contig_3.37088	CDS	65	37285 - 37088	Other(7.86)	9221	NC_025428_p49	ND	tail length tape measure protein
contig_3.37330	CDS	153	37791 - 37330	Other(6.52)	5260	JF713456_p59	ND	tail protein
contig_3.37888	CDS	379	39027 - 37888	Major tail(8.54)	807	MF476925_p24	['Bacterial Ig-like domain (group 1)']	major tail protein with Ig-like domain
contig_3.39041	CDS	167	39544 - 39041	Portal(2.84)	5078	MG030346_p40	ND	tail terminator
contig_3.39541	CDS	208	40167 - 39541	Other(3.6)	16305	NC_019526_p49	ND	virion structural protein
contig_3.40167	CDS	121	40532 - 40167	HTJ(5.77)	4858	MF476925_p21	ND	unknown function
contig_3.40535	CDS	97	40828 - 40535	Other(3.94)	7559	NC_031930_p19	ND	unknown function
contig_3.40890	CDS	354	41954 - 40890	Major capsid(9.32)	29	p33806	['Phage major capsid protein E']	major head protein
contig_3.41967	CDS	139	42386 - 41967	Major capsid(3.31)	17361	p56933	['Bacteriophage lambda head decoration protein D']	unknown function
contig_3.42401	CDS	527	43984 - 42401	Other(3.91)	53	p79242	['Peptidase family S49']	head maturation protease
contig_3.43714	CDS	559	45393 - 43714	Portal(9.17)	21	p173499	['Phage portal protein, lambda family']	portal protein
contig_3.45390	CDS	84	45644 - 45390	Other(8.34)	75	p130745	['gpW']	head-tail adaptor Ad1
contig_3.45655	CDS	691	47730 - 45655	Other(6.99)	15	p173497	['Phage terminase large subunit (GpA)']	terminase large subunit
contig_3.47720	CDS	189	48289 - 47720	Other(5.53)	141	p69558	['Protein of unknown function (DUF1441)']	terminase small subunit
contig_3.48276	CDS	491	49751 - 48276	Other(9.21)	62	NC_028990_p38	['SNF2-related domain']	DNA helicase
contig_3.49798	CDS	95	50085 - 49798	Other(9.75)	93	NC_028826_p5	ND	endonuclease
contig_3.50087	CDS	679	52126 - 50087	Other(4.24)	10285	p32374	['DNA polymerase family A']	DNA polymerase
contig_3.52193	CDS	198	52789 - 52193	Other(9.65)	112	MF768469_p20	['Protein of unknown function (DUF2815)']	Gp2.5-like ssDNA binding protein and ssDNA annealing protein
contig_3.52844	CDS	445	54181 - 52844	Other(7.06)	69	NC_019519_p21	['Protein of unknown function (DUF2800)']	exonuclease
contig_3.54174	CDS	109	54503 - 54174	Other(8.42)	8318	NC_031228_p71	ND	unknown function
contig_3.54997	CDS	148	54551 - 54997	Other(9.93)	20670	NC_022771_p230	ND	unknown function
contig_3.55141	CDS	37	55028 - 55141	Other(8.34)	26601	JX174275_p47	ND	unknown function
contig_3.55411	CDS	63	55220 - 55411	Other(6.9)	7401	NC_025442_p3	ND	unknown function
contig_3.58081	CDS	860	55499 - 58081	Other(5.07)	1156	NC_019550_p28	['Primase C terminal 2 (PriCT-2)', 'Bifunctional DNA primase/polymerase, N-terminal', 'Family of unknown function (DUF5906)']	DNA primase
contig_3.58129	CDS	108	58455 - 58129	Other(8.19)	18318	KU574722_p511	['Helix-turn-helix domain']	HTH DNA binding protein
contig_3.58496	CDS	48	58642 - 58496	Other(9.52)	25209	KU574722_p435	ND	unknown function
contig_3.58869	CDS	40	58991 - 58869	Other(9.49)	37125	NC_031111_p91	ND	unknown function
ND - no data

## Sheet: Salmonella phage KKP 3830
Table S1 (B). Genome annotation of functional ORFs of thef Salmonella phage strain KKP 3830.
Protein ID	Features type	Length [amino acids]	CDS location in phage genome	Classification of structural protein	Phrog ID	Phrog protein	Domain	Classify functional protein
contig_1.120	CDS	39	1 - 120	Other(9.98)	38095	NC_031918_p66	ND	unknown function
contig_1.228	CDS	29	139 - 228	Portal(5.92)	22750	p49333	ND	unknown function
contig_1.721	CDS	144	287 - 721	Other(9.01)	21159	MH102284_p78	ND	unknown function
contig_1.955	CDS	52	797 - 955	Other(6.91)	4653	KY652726_p204	ND	unknown function
contig_1.1223	CDS	94	939 - 1223	Other(8.7)	1972	MG208881_p15	ND	unknown function
contig_1.1521	CDS	74	1297 - 1521	Other(4.72)	7421	NC_019725_p11	ND	unknown function
contig_1.1754	CDS	78	1518 - 1754	Other(9.09)	14152	NC_009540_p82	ND	unknown function
contig_1.1945	CDS	64	1751 - 1945	Other(9.77)	6503	NC_031026_p67	ND	unknown function
contig_1.2130	CDS	61	1945 - 2130	Other(9.73)	2360	NC_028925_p235	ND	unknown function
contig_1.2484	CDS	93	2203 - 2484	Other(8.82)	6147	NC_031026_p66	ND	unknown function
contig_1.2717	CDS	77	2484 - 2717	Other(10.0)	5016	KY780482_p51	ND	unknown function
contig_1.2911	CDS	65	2714 - 2911	Other(9.8)	30800	KY657202_p61	ND	unknown function
contig_1.3075	CDS	55	2908 - 3075	Other(9.97)	16768	NC_031026_p64	ND	unknown function
contig_1.3355	CDS	73	3134 - 3355	Other(9.05)	4344	NC_026010_p81	ND	unknown function
contig_1.3581	CDS	74	3357 - 3581	Other(9.98)	9323	NC_031050_p78	ND	unknown function
contig_1.3804	CDS	35	3697 - 3804	Other(8.99)	25579	NC_028982_p8	ND	unknown function
contig_1.4477	CDS	231	3782 - 4477	Other(9.77)	757	KX495186_p170	ND	DNA methyltransferase
contig_1.4557	CDS	33	4456 - 4557	Other(9.65)	24955	KY709296_p68	ND	unknown function
contig_1.4912	CDS	120	4550 - 4912	Other(6.95)	2684	NC_026010_p83	ND	unknown function
contig_1.5157	CDS	82	4909 - 5157	Other(7.88)	12725	NC_031026_p59	ND	unknown function
contig_1.6805	CDS	526	5225 - 6805	Other(4.81)	2373	NC_010495_p48	['Protein of unknown function (DUF3987)']	DNA helicase
contig_1.7200	CDS	130	6808 - 7200	Other(9.99)	2794	NC_028774_p43	ND	unknown function
contig_1.7303	CDS	39	7184 - 7303	Other(9.59)	9539	NC_031050_p72	ND	unknown function
contig_1.7330	CDS	129	7719 - 7330	Other(2.7)	1804	MF158039_p7	ND	Rz-like spanin
contig_1.7716	CDS	164	8210 - 7716	Other(9.46)	7	NC_001629_p14	['Phage lysozyme']	endolysin
contig_1.8223	CDS	71	8438 - 8223	Other(7.04)	2877	MF158039_p9	ND	holin
contig_1.8551	CDS	371	9666 - 8551	Other(7.95)	704	MF001366_p25	ND	DNA repair exonuclease
contig_1.9760	CDS	91	10035 - 9760	Other(9.89)	2817	KT825490_p38	ND	unknown function
contig_1.9983	CDS	54	10147 - 9983	Other(9.85)	2180	KY398841_p53	ND	unknown function
contig_1.10220	CDS	88	10486 - 10220	Other(7.99)	2676	KY985004_p59	ND	unknown function
contig_1.10489	CDS	107	10812 - 10489	Other(6.3)	111	p64666	['DNA N-6-adenine-methyltransferase (Dam)']	DNA methyltransferase
contig_1.10899	CDS	108	11225 - 10899	Other(8.42)	111	p64666	['DNA N-6-adenine-methyltransferase (Dam)']	DNA methyltransferase
contig_1.11227	CDS	133	11628 - 11227	Other(9.88)	7420	MG241338_p27	ND	unknown function
contig_1.11577	CDS	135	11984 - 11577	Other(9.86)	824	NC_025471_p57	['VRR-NUC domain']	unknown function
contig_1.11987	CDS	657	13960 - 11987	Other(8.23)	34481	NC_019725_p65	['Helicase conserved C-terminal domain', 'Type III restriction enzyme, res subunit']	unknown function
contig_1.14657	CDS	202	14049 - 14657	Other(9.34)	2856	MG241338_p30	ND	transcriptional regulator
contig_1.15642	CDS	308	14716 - 15642	Other(9.93)	510	p276824	['Zinc-binding domain of primase-helicase']	DNA primase
contig_1.18240	CDS	813	15799 - 18240	Tail fiber(9.39)	5481	MF996376_p3	['Chaperone of endosialidase']	tail fiber protein
contig_1.18337	CDS	34	18233 - 18337	Other(9.97)	33985	KP881332_p165	ND	unknown function
contig_1.18547	CDS	57	18374 - 18547	Other(7.08)	7239	KY926791_p88	ND	unknown function
contig_1.18560	CDS	148	19006 - 18560	Other(5.3)	18154	MG641885_p29	ND	single strand DNA binding protein
contig_1.19045	CDS	220	19707 - 19045	Other(3.08)	2324	KX815270_p34	['ERF superfamily']	Erf-like ssDNA annealing protein
contig_1.19754	CDS	96	20044 - 19754	Other(6.17)	11265	MH102284_p29	ND	tail length tape measure protein
contig_1.20120	CDS	367	21223 - 20120	Other(7.05)	412	p123465	['PDDEXK-like domain of unknown function (DUF3799)']	exonuclease VIII
contig_1.21238	CDS	36	21348 - 21238	Other(10.0)	13057	MF979560_p122	ND	unknown function
contig_1.21341	CDS	39	21460 - 21341	Other(10.0)	32755	p29927	ND	unknown function
contig_1.21636	CDS	120	21998 - 21636	Collar(5.91)	30651	p350736	ND	unknown function
contig_1.21958	CDS	1151	25413 - 21958	Tail fiber(9.75)	2589	p216626	['Putative phage tail protein', 'Domain of unknown function (DUF1983)']	tail protein
contig_1.25495	CDS	199	26094 - 25495	Other(6.87)	4946	p86380	['Bacteriophage lambda tail assembly protein I']	tail protein
contig_1.26087	CDS	240	26809 - 26087	Minor tail(7.61)	30	p413732	['Prokaryotic homologs of the JAB domain', 'NlpC/P60 family']	minor tail protein
contig_1.26806	CDS	252	27564 - 26806	Minor tail(9.99)	18	p22999	['Phage minor tail protein L']	minor tail protein
contig_1.27632	CDS	115	27979 - 27632	Minor tail(8.94)	14	NC_019721_p14	['Phage minor tail protein']	minor tail protein
contig_1.27979	CDS	969	30888 - 27979	Minor capsid(6.26)	24	p178470	['Prophage tail length tape measure protein', 'Lambda phage tail tape-measure protein (Tape_meas_lam_C)']	tail length tape measure protein
contig_1.30926	CDS	65	31123 - 30926	Other(9.01)	680	p64383	['Phage related hypothetical protein (DUF1799)']	tail length tape measure protein
contig_1.31243	CDS	104	31557 - 31243	Other(6.61)	569	KY926791_p9	['Phage tail assembly chaperone']	tail length tape measure protein
contig_1.31635	CDS	219	32294 - 31635	Major tail(9.44)	584	NC_027383_p27	['Phage tail tube protein, TTP']	major tail protein
contig_1.32309	CDS	67	32512 - 32309	Minor tail(3.61)	179	NC_026610_p50	['Bacteriophage related domain of unknown function']	tail terminator
contig_1.32551	CDS	193	33132 - 32551	Other(6.33)	169	NC_018454_p37	ND	tail completion or Neck1 protein
contig_1.33125	CDS	123	33496 - 33125	Other(3.43)	161	NC_029019_p15	ND	head closure Hc1
contig_1.33493	CDS	143	33924 - 33493	Other(7.95)	302	p289237	['Protein of unknown function (DUF4054)']	virion structural protein
contig_1.33959	CDS	90	34231 - 33959	Other(3.71)	2716	NC_028786_p13	ND	unknown function
contig_1.34293	CDS	324	35267 - 34293	Major capsid(3.41)	264	p358640	['Uncharacterized protein conserved in bacteria (DUF2184)']	major head protein
contig_1.35357	CDS	146	35797 - 35357	Other(9.79)	1989	NC_024784_p7	ND	unknown function
contig_1.35841	CDS	159	36320 - 35841	Major tail(4.83)	1989	NC_024784_p7	ND	unknown function
contig_1.36333	CDS	369	37442 - 36333	HTJ(2.37)	530	p70477	['Uncharacterized protein conserved in bacteria (DUF2213)']	head maturation protease
contig_1.37439	CDS	223	38110 - 37439	Minor capsid(9.49)	324	p327935	['Phage Mu protein F like protein']	head morphogenesis
contig_1.38107	CDS	435	39414 - 38107	Portal(6.53)	146	p353614	['Protein of unknown function (DUF1073)']	portal protein
contig_1.39455	CDS	523	41026 - 39455	Other(8.36)	38	p428778	['Terminase RNaseH-like domain']	terminase large subunit
contig_1.41038	CDS	174	41562 - 41038	Other(7.09)	606	NC_011318_p1	['DNA-packaging protein gp3']	terminase small subunit
contig_1.41650	CDS	76	41880 - 41650	Other(9.98)	5976	MF093736_p42	ND	unknown function
contig_1.41874	CDS	62	42062 - 41874	Other(10.0)	2919	KT825490_p70	ND	unknown function
contig_1.42046	CDS	53	42207 - 42046	Other(9.84)	6666	MF093736_p44	ND	unknown function
contig_1.42167	CDS	34	42271 - 42167	Other(9.72)	13811	NC_028743_p47	ND	unknown function
contig_1.42390	CDS	75	42617 - 42390	Other(10.0)	303	p344653	ND	unknown function
contig_1.42619	CDS	42	42747 - 42619	Other(9.96)	1312	NC_028795_p19	ND	unknown function
contig_1.42817	CDS	142	43245 - 42817	Other(8.87)	6144	MF612072_p67	['Protein of unknown function (DUF550)']	unknown function
contig_1.43242	CDS	83	43493 - 43242	Portal(3.71)	11097	NC_009540_p21	ND	unknown function
contig_1.43490	CDS	69	43699 - 43490	Other(6.56)	6031	KY657202_p35	ND	unknown function
contig_1.43774	CDS	165	44271 - 43774	Other(8.73)	13504	KY657202_p36	ND	unknown function
contig_1.44283	CDS	81	44528 - 44283	Other(9.99)	8758	NC_027350_p80	ND	unknown function
contig_1.44525	CDS	60	44707 - 44525	Other(9.56)	14912	KY694971_p64	ND	unknown function
contig_1.44704	CDS	64	44898 - 44704	Other(8.54)	9122	NC_031026_p2	ND	unknown function
contig_1.44901	CDS	76	45131 - 44901	Other(9.79)	25318	MG241338_p72	ND	unknown function
contig_1.45210	CDS	191	45785 - 45210	Other(8.95)	139	KX507046_p83	ND	deoxynucleoside monophosphate kinase
contig_1.45778	CDS	60	45960 - 45778	Other(7.54)	16293	KY657202_p42	ND	unknown function
contig_1.45957	CDS	84	46211 - 45957	Other(10.0)	30280	MH102284_p69	ND	unknown function
contig_1.46289	CDS	62	46477 - 46289	Other(9.86)	14011	KY657202_p44	ND	unknown function
contig_1.46477	CDS	33	46578 - 46477	Other(9.9)	5364	KX576640_p40	ND	unknown function
contig_1.46575	CDS	58	46751 - 46575	Other(9.24)	25234	p298318	ND	unknown function
contig_1.46748	CDS	180	47290 - 46748	Other(7.99)	415	NC_014635_p66	['HAD superfamily, subfamily IIIB (Acid phosphatase)']	polynucleotide kinase
contig_1.47253	CDS	49	47402 - 47253	Other(9.42)	17726	KY657202_p46	ND	unknown function
contig_1.47477	CDS	94	47761 - 47477	Other(9.98)	8382	NC_031053_p39	ND	unknown function
contig_1.47821	CDS	187	48384 - 47821	Other(2.96)	7116	NC_009540_p6	ND	unknown function
contig_1.48448	CDS	38	48564 - 48448	Other(9.52)	6763	NC_019399_p273	['Anticodon nuclease activator family']	activator of host PrrC lysyl-tRNA endonuclease
contig_1.48539	CDS	86	48799 - 48539	Other(9.99)	13854	KY694971_p52	ND	unknown function
contig_1.48897	CDS	37	49010 - 48897	Other(9.7)	12677	MF288920_p17	ND	unknown function
contig_1.49003	CDS	35	49110 - 49003	Other(9.91)	22353	KY694971_p48	ND	unknown function
contig_1.49110	CDS	77	49343 - 49110	Other(8.3)	18849	NC_027350_p59	ND	unknown function
contig_1.49343	CDS	82	49591 - 49343	Other(5.77)	31863	NC_021331_p35	ND	unknown function
contig_1.49592	CDS	157	50065 - 49592	Other(7.38)	4841	NC_031026_p73	ND	unknown function
contig_1.50053	CDS	99	50352 - 50053	Other(9.76)	27235	MG696114_p144	ND	unknown function
contig_1.50395	CDS	39	50514 - 50395	Other(10.0)	25821	KP861230_p49	ND	unknown function
ND - no data
